# Supplementary material
Source: HighWire-hosted journal article supplement (https://bmjopen.bmj.com/content/12/4/e058270)
Supplement: inline-supplementary-material-1 [file inline-supplementary-material-1.pdf]

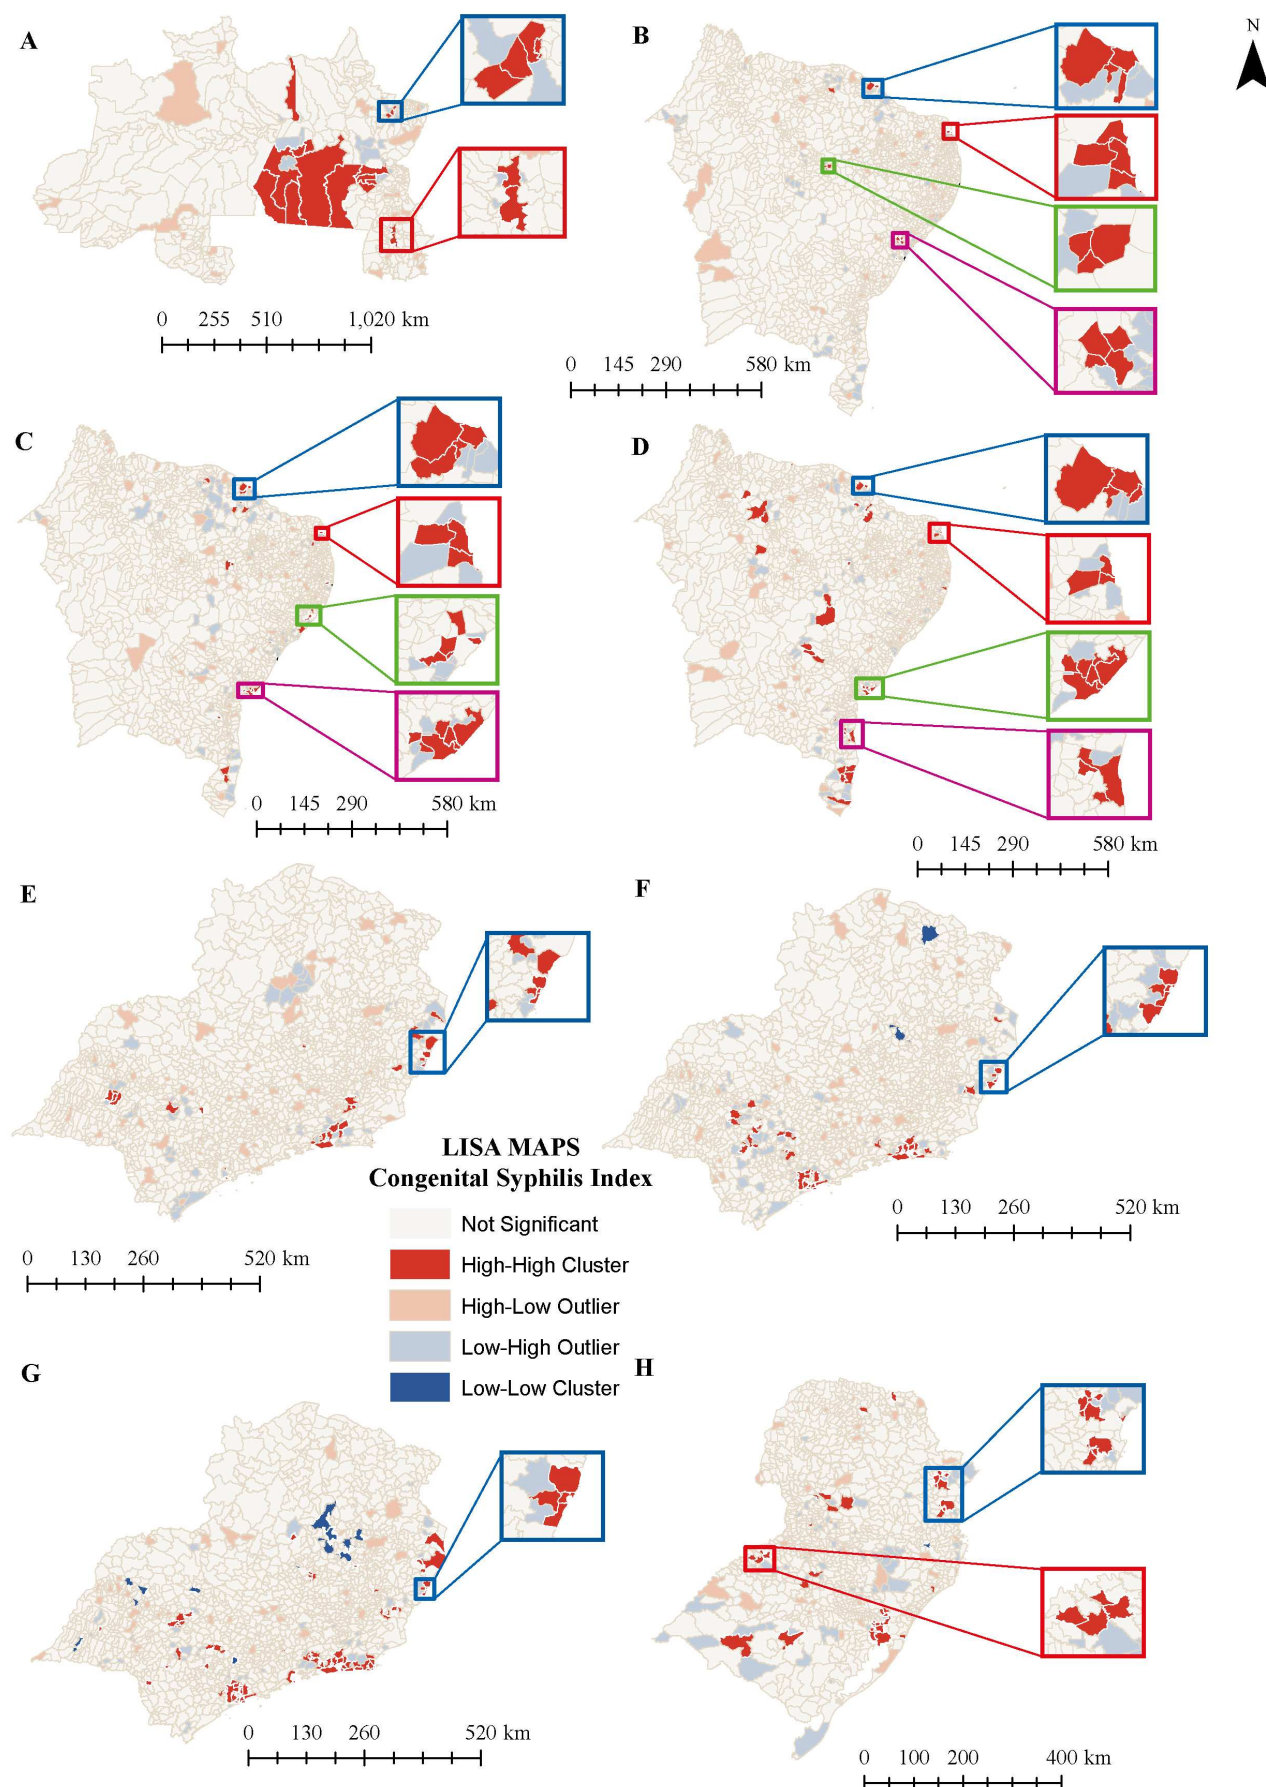

Online Supplemental Figure 1 - Magnification of the clusterings pointed in LISA maps in the states of Pará and Tocantins (Suppl. Fig. 1A - blue and red boxes, respectively); Piauí and Sergipe (Suppl. Fig. 1B - green and purple boxes, respectively); Rio Grande do Norte and Ceará (Suppl. Fig. 1B, 1C, 1D - red and blue boxes, respectively); Alagoas (Suppl. Fig. 1C - green box), Bahia (Suppl. Fig. 1C - purple box; and Suppl. Fig. 1D - green and purple boxes, respectively); Espírito Santo (Suppl. Fig. 1E; 1F; 1G - blue box); Santa Catarina and Paraná (Suppl. Fig. 1H - blue box) and Rio Grande do Sul (Suppl. Fig. 1H - red box)
