# Supplementary material
Source: HighWire-hosted journal article supplement (https://bmjopen.bmj.com/content/12/4/e058270)
Supplement: inline-supplementary-material-2 [file inline-supplementary-material-2.pdf]

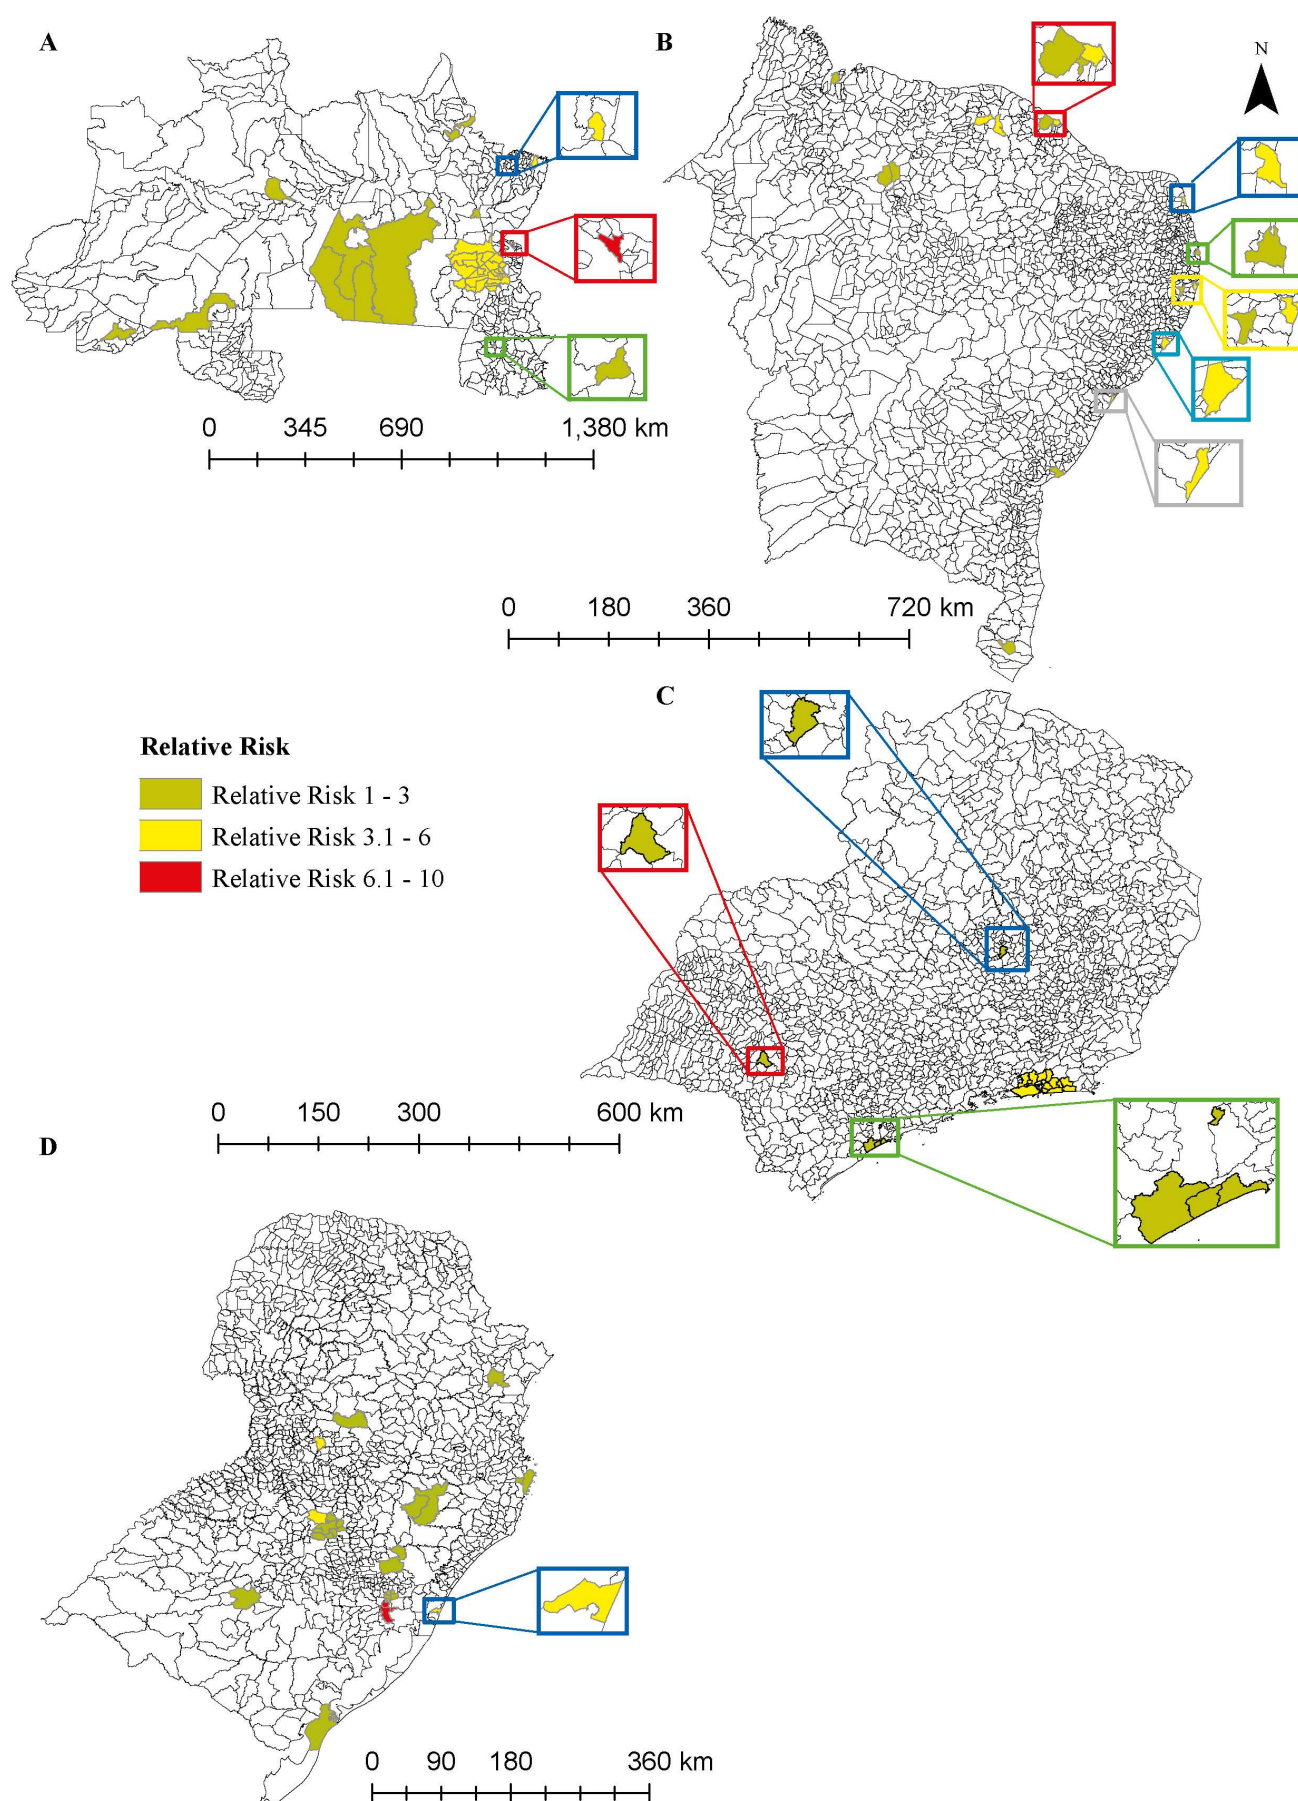

Online Supplemental Figure 2 - Magnification of the spatial risk zones for the CS in the states of Pará (Suppl. Fig. 2A - blue box), Ceará Tocantins (Suppl. Fig. 2A - red and green boxes), Ceará (Suppl. Fig. 2B - red box), Rio Grande do Norte (Suppl. Fig. 2B - blue box), Pernambuco (Suppl. Fig. 2B - green box), Recife and Olinda (Suppl. Fig. 2B - yellow box), Alagoas (Suppl. Fig. 2B - cyan green box), Sergipe (Suppl. Fig. 2B - grey box), Minas Gerais (Suppl. Fig. 2C - blue box), São Paulo (Suppl. Fig. 2C - red and green boxes) and Porto Alegre (Suppl. Fig. 2D - blue box).
