# Supplementary material
Source: HighWire-hosted journal article supplement (https://bmjopen.bmj.com/content/12/4/e058270)
Supplement: inline-supplementary-material-3 [file inline-supplementary-material-3.pdf]

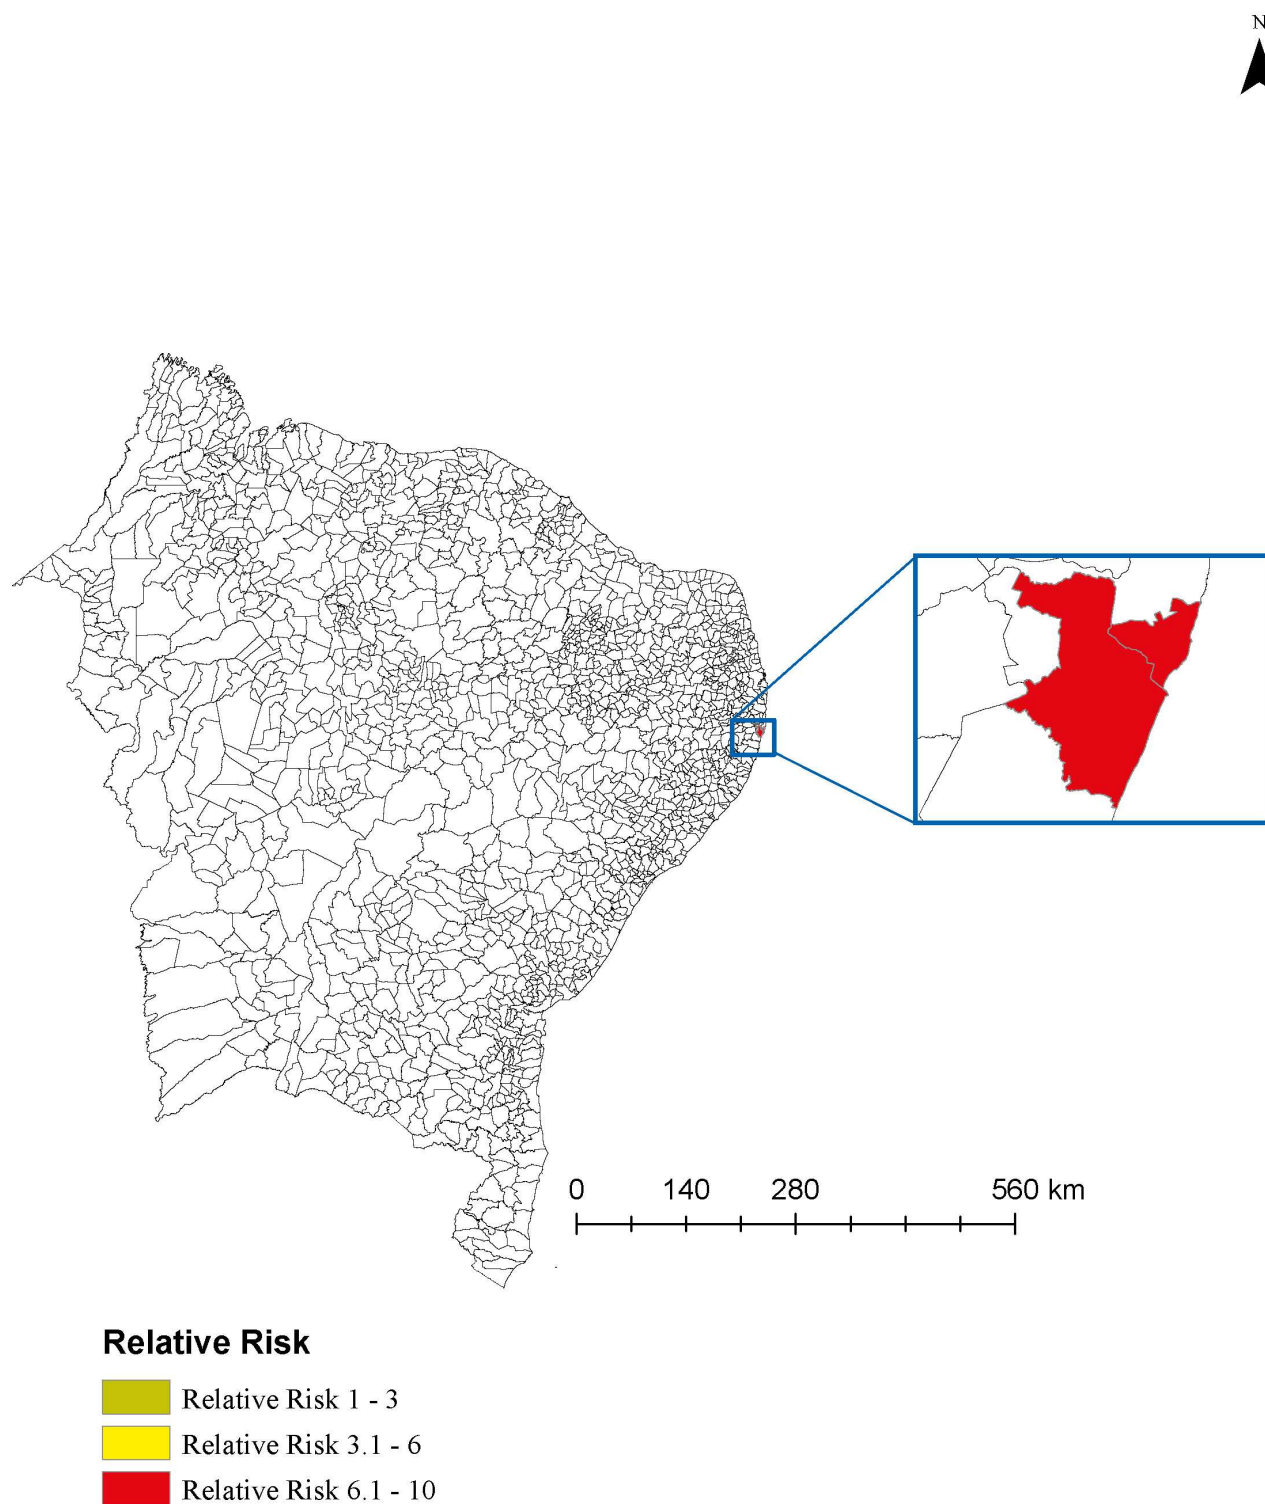

Online Supplemental Figure 3 - Magnification of the spatiotemporal risk zones for CS in the state of Pernambuco (blue box).
